# Supplementary material
Source: MDPI journal article supplement (https://www.mdpi.com/2073-4395/12/6/1382)
Supplement: s1 [file s1]

# Evaluation of New Fall Rye Cultivar ‘Bono’ in Single and Double Cropping Systems

Enkhjargal Darambazar <sup>1</sup>, Kathy Larson <sup>2</sup>, Daalkhaijav Damiran <sup>1</sup>, and Herbert A. Lardner <sup>1,\*</sup>

<sup>1</sup> Department of Animal and Poultry Science, University of Saskatchewan, Saskatoon, SK S7N 5A8, Canada; end172@usask.ca (E.D.); daal.damiran@usask.ca (D.D.)

<sup>2</sup> Department of Agricultural and Resource Economics, College of Agriculture and Bioresources, University of Saskatchewan, Saskatoon, SK S7N 5A8, Canada; kathy.larson@usask.ca (K.L.)

\* Correspondence: bart.lardner@usask.ca (H.A.L.)

**Supplemental Table S1.** One-way ANOVA results of spring barley nutrient composition

| Item                                           | DF† | Sum of Square | Mean Square | F       | p-value |
|------------------------------------------------|-----|---------------|-------------|---------|---------|
| Basic chemical profile (g kg <sup>-1</sup> DM) |     |               |             |         |         |
| ash                                            | 1   | 0.276         | 0.276       | 1.100   | 0.313   |
| acid detergent fibre                           | 1   | 0.640         | 0.640       | 0.080   | 0.786   |
| neutral detergent fibre                        | 1   | 8.410         | 8.410       | 0.430   | 0.523   |
| crude protein                                  | 1   | 4.203         | 4.203       | 1.600   | 0.227   |
| Total digestible nutrients                     | 1   | 0.250         | 0.250       | 0.040   | 0.839   |
| Relative feed value (RFV)                      | 1   | 49.000        | 49.000      | 0.170   | 0.687   |
| Energy values (Mcal kg <sup>-1</sup> DM)       |     |               |             |         |         |
| net energy for gain                            | 1   | 0.000         | 0.000       | 0.060   | 0.808   |
| net energy maintenance                         | 1   | 0.001         | 0.001       | 0.110   | 0.743   |
| Macro minerals (g kg <sup>-1</sup> DM)         |     |               |             |         |         |
| calcium                                        | 1   | 0.001         | 0.001       | 1.700   | 0.213   |
| phosphorus                                     | 1   | 0.0002        | 0.0002      | 0.290   | 0.600   |
| potassium                                      | 1   | 0.017         | 0.017       | 19.240  | 0.001   |
| magnesium                                      | 1   | 0.004         | 0.004       | 4.710   | 0.048   |
| sodium                                         | 1   | 0.044         | 0.044       | 1.520   | 0.238   |
| Micro minerals (mg kg <sup>-1</sup> DM)        |     |               |             |         |         |
| copper                                         | 1   | 0.00000       | 0.00000     | 0.00000 | 1.000   |
| zinc                                           | 1   | 0.00000       | 0.00000     | 0.00000 | 1.000   |
| iron                                           | 1   | 1722.250      | 1722.250    | 0.890   | 0.361   |
| manganese                                      | 1   | 72.250        | 72.250      | 5.570   | 0.033   |

*Note.* †Treatments: BonoFR, fall rye cv. Bono; HazletFR, fall rye cv. Hazlet; Barley-BonoFR, double cropping treatment barley followed by BonoFR; Barley-HazletFR, double cropping treatment of early spring barley (cv. Maverick) followed by HazletFR.

**Supplemental Table S2.** One-way ANOVA results of winter cereal nutrient composition

| Item                                           | DF† | Sum of Square | Mean Square | F     | p-value |
|------------------------------------------------|-----|---------------|-------------|-------|---------|
| Basic chemical profile (g kg <sup>-1</sup> DM) |     |               |             |       |         |
| ash                                            | 4   | 15.566        | 3.891       | 1.570 | 0.209   |
| acid detergent fibre                           | 4   | 80.842        | 20.210      | 0.820 | 0.523   |
| neutral detergent fibre                        | 4   | 207.590       | 51.898      | 1.040 | 0.402   |
| Crude protein profile (g kg <sup>-1</sup> DM)  |     |               |             |       |         |
| crude protein (CP)                             | 4   | 51.490        | 12.873      | 0.820 | 0.521   |
| soluble protein                                | 4   | 8.285         | 2.071       | 1.160 | 0.346   |
| soluble protein (%CP)                          | 4   | 145.198       | 36.300      | 1.790 | 0.157   |
| rumen degradable CP                            | 4   | 23.449        | 5.862       | 0.870 | 0.495   |
| rumen degradable CP (%CP)                      | 4   | 36.490        | 9.123       | 1.790 | 0.158   |
| Total digestible nutrients                     | 4   | 27.421        | 6.855       | 0.320 | 0.862   |
| Relative feed value                            | 4   | 1870.000      | 467.500     | 0.710 | 0.593   |
| Energy values (Mcal kg <sup>-1</sup> DM)       |     |               |             |       |         |
| net energy for gain                            | 4   | 0.032         | 0.008       | 1.870 | 0.141   |
| net energy for maintenance                     | 4   | 0.039         | 0.010       | 0.650 | 0.632   |
| Macro minerals (g kg <sup>-1</sup> DM)         |     |               |             |       |         |
| calcium                                        | 4   | 0.002         | 0.001       | 0.090 | 0.984   |
| phosphorus                                     | 4   | 0.004         | 0.001       | 0.570 | 0.689   |
| potassium                                      | 4   | 1.815         | 0.454       | 2.970 | 0.035   |
| magnesium                                      | 4   | 0.004         | 0.001       | 0.280 | 0.887   |
| sodium                                         | 4   | 0.033         | 0.008       | 0.700 | 0.598   |
| Micro minerals (mg kg <sup>-1</sup> DM)        |     |               |             |       |         |
| copper                                         | 4   | 12.667        | 3.167       | 0.500 | 0.735   |
| zinc                                           | 4   | 372.400       | 93.100      | 0.550 | 0.700   |
| iron                                           | 4   | 20855.143     | 5213.786    | 0.630 | 0.643   |
| manganese                                      | 4   | 1184.171      | 296.043     | 0.420 | 0.791   |

*Note.* †Treatments: BonoFR, fall rye cv. Bono; HazletFR, fall rye cv. Hazlet; PikaWT, winter triticale cv. Pika; Barley-BonoFR; double cropping treatment barley (cv. Maverick) followed by BonoFR; Barley-HazletFR, double cropping treatment of spring barley followed by HazletFR.

**Supplemental Table S3.** One-way ANOVA results for dry matter yield, nutrient yield and uptake, and N use efficiency of barley and winter cereals

| Item                                  | DF† | Sum of Square | Mean Square | F    | p-value |
|---------------------------------------|-----|---------------|-------------|------|---------|
| <b>DMY, kg ha<sup>-1</sup></b>        |     |               |             |      |         |
| barley                                | 1   | 762325.44     | 762325.44   | 0.04 | 0.843   |
| winter cereal                         | 4   | 449108.00     | 112277.00   | 0.1  | 0.982   |
| total                                 | 4   | 266456723.70  | 66614180.90 | 5.05 | 0.003   |
| <b>CPY†, kg ha<sup>-1</sup></b>       |     |               |             |      |         |
| barley                                | 1   | 2043.27       | 2043.27     | 0.01 | 0.911   |
| winter cereal                         | 4   | 4482.53       | 1120.63     | 0.05 | 0.995   |
| total                                 | 4   | 1931614.27    | 482903.57   | 3.76 | 0.014   |
| <b>TDNY, kg ha<sup>-1</sup></b>       |     |               |             |      |         |
| barley                                | 1   | 319354.96     | 319354.96   | 0.04 | 0.849   |
| winter cereal                         | 4   | 119077.56     | 29769.39    | 0.07 | 0.990   |
| total                                 | 4   | 120407988.30  | 30101997.10 | 5.27 | 0.002   |
| <b>Mineral uptake</b>                 |     |               |             |      |         |
| <b>Nitrogen, kg ha<sup>-1</sup></b>   |     |               |             |      |         |
| barley                                | 1   | 52.27         | 52.27       | 0.01 | 0.911   |
| winter cereal                         | 4   | 114.79        | 28.70       | 0.05 | 0.995   |
| total                                 | 4   | 49448.24      | 12362.06    | 3.75 | 0.014   |
| <b>Phosphorus, kg ha<sup>-1</sup></b> |     |               |             |      |         |
| barley                                | 1   | 1.11          | 1.11        | 0.01 | 0.917   |
| winter cereal                         | 4   | 1.44          | 0.36        | 0.07 | 0.990   |
| total                                 | 4   | 1410.61       | 352.65      | 4.97 | 0.003   |
| <b>Potassium, kg ha<sup>-1</sup></b>  |     |               |             |      |         |
| barley                                | 1   | 1.00          | 1.00        | 0    | 0.976   |
| winter cereal                         | 4   | 411.67        | 102.92      | 0.16 | 0.958   |
| total                                 | 4   | 12721.52      | 3180.38     | 1.86 | 0.143   |
| <b>N use efficiency</b>               |     |               |             |      |         |
| barley                                | 1   | 184.54        | 184.54      | 0.84 | 0.376   |
| winter cereal                         | 4   | 270.91        | 67.73       | 1.18 | 0.340   |
| total                                 | 4   | 5555.16       | 1388.79     | 25   | <0.001  |

Note. †Treatments: BonoFR, fall rye cv. Bono; HazletFR, fall rye cv. Hazlet; PikaWT, winter triticale cv. Pika; Barley-BonoFR, double cropping treatment barley (cv. Maverick) followed by BonoFR; Barley-HazletFR, double cropping treatment of spring barley followed by HazletFR; Total, barley CPY/TDNY + fall rye CPY/TDNY
